# Supplementary material
Source: PubMed Central journal article supplement (PMC6514612)
Supplement: supp_RA118.006787_142057_1_supp_298429_px4dsx.pdf [file supp_RA118.006787_142057_1_supp_298429_px4dsx.pdf]

## Supporting Information

### **Protein Z-dependent protease inhibitor (ZPI) is a physiologically significant inhibitor of prothrombinase function**

**Xin Huang<sup>1,\*</sup>, Richard Swanson<sup>1</sup>, Heather K. Kroh<sup>2</sup>, Paul E. Bock<sup>2</sup>**

From the <sup>1</sup>Department of Periodontics, University of Illinois at Chicago, Chicago, Illinois 60612 and

<sup>2</sup>Department of Pathology, Microbiology, and Immunology, Vanderbilt University Medical Center,  
Nashville, TN, 37232, USA.

\*To whom correspondence should be addressed: Xin Huang, PHD

Email: [xinhuang@uic.edu](mailto:xinhuang@uic.edu)

Tel: 312-413-7645

## **Contents:**

### **Supplementary Figures S1-S3**

**Supplementary Table S1.** Parameters derived from thrombin generation assays in normal human plasma with TF, FXa and FXIIa triggers

## Supplementary Figure S1

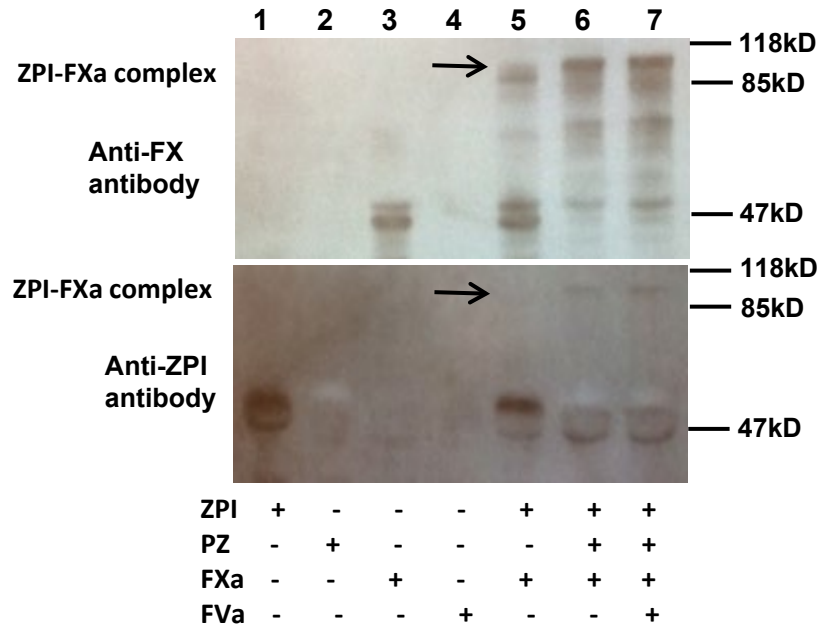

### Supplementary Figure S1.

#### Immunoblotting analysis of ZPI/PZ inhibition of membrane-associated free or prothrombinase-bound FXa

Reactions of 200nM ZPI and 50nM FXa were done +/- 200nM PZ and +/- 100nM FVa as indicated in Tris buffer pH 7.4, 25°C, in the presence of 25 µM PS/PC, 5 mM CaCl<sub>2</sub>. Reactions were initiated with FXa or FXa/FVa complex and quenched after 10 mins with 400 µM EGR-chloromethylketone. Samples were denatured in pH 2.0 SDS buffer by heating at 100°C for 5 mins, and then adjusted to neutral pH and 30 µl samples analyzed by 10% SDS-PAGE. Protein bands were transferred to PVDF membranes, and then detected either with anti-factor Xa (Enzyme Research Laboratories) or anti-ZPI (Abnova) antibodies. Multiple bands in lanes 5,6,7 of the upper gel below the main ZPI-FXa complex band reflect complex degradation. The weak signal for the ZPI-FXa complex bands in the lower gel result from the relatively poor reactivity of the anti-ZPI antibody with conformationally altered ZPI in the ZPI-FXa complex.

## Supplementary Figure S2

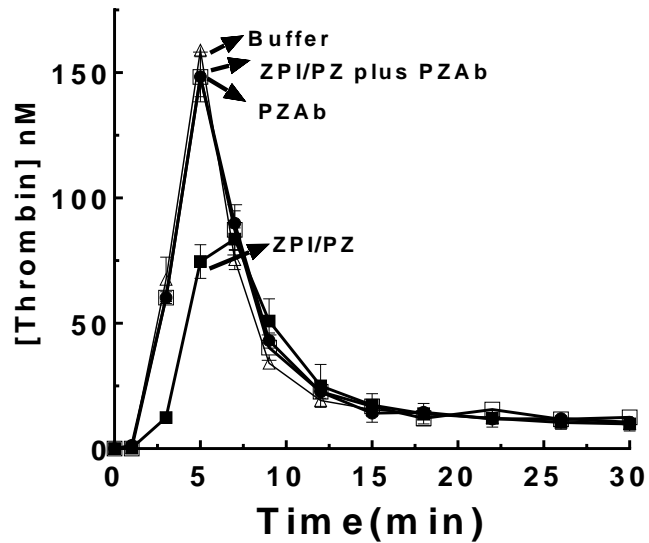

### Supplementary Figure S2.

**PZAB does not inhibit thrombin generation in PZ-deficient plasma** Thrombin generation in PZ-deficient plasma was measured at pH 7.4, 37°C as in Fig. 8 with or without the addition of: i) buffer ( $\Delta$ ), ii) PZAb (160 mg/ml) ( $\square$ ), iii) ZPI/PZ (25 nM each) ( $\blacksquare$ ), or iv) ZPI/PZ plus PZAb ( $\bullet$ ) as indicated. Data were derived from three independent measurements  $\pm$  SD.

### Supplementary Figure S3

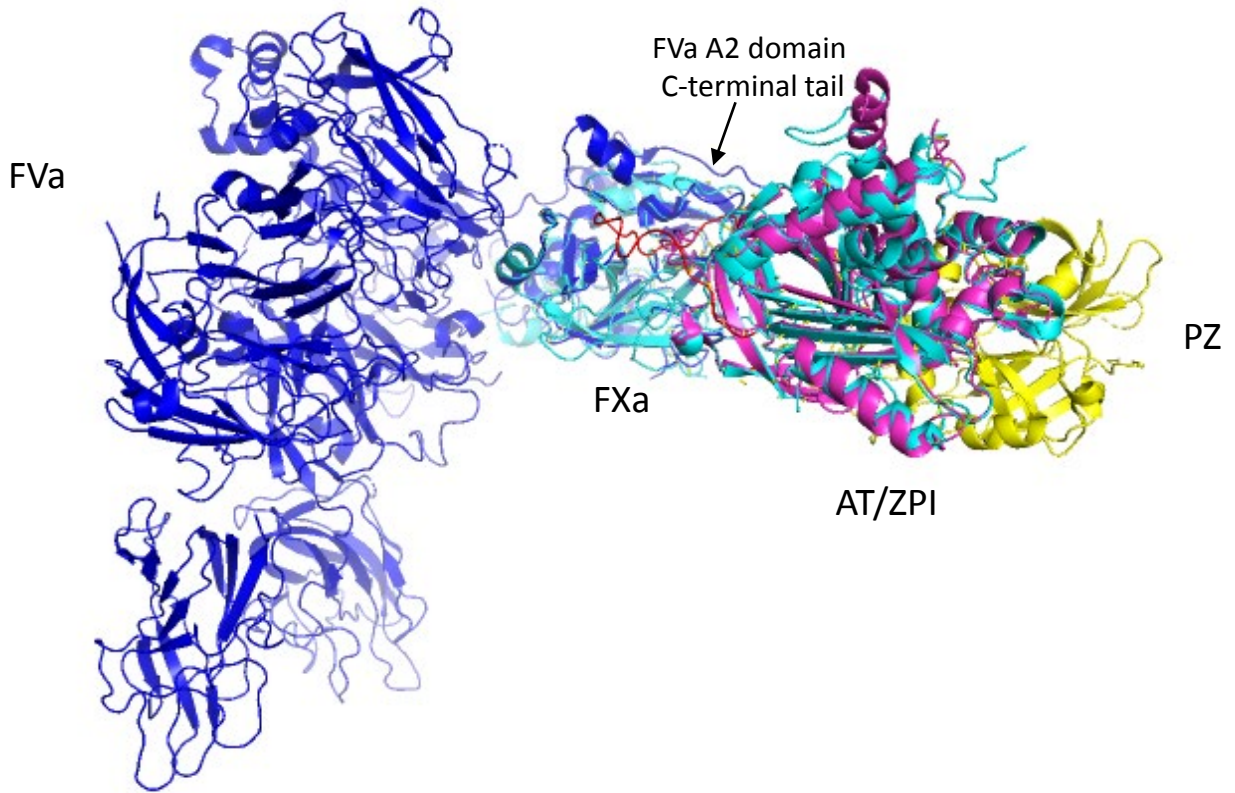

#### Supplementary Figure S3.

**Model of ZPI-PZ complex interaction with FXa bound to FVa in prothrombinase:** The model was made by aligning the structures of prothrombinase from *P. Textalis* snake venom (blue; pdb:4BXS ) with the human antithrombin (AT)-FXa Michaelis complex (cyan; pdb: 2GD4) and the ZPI-PZ complex (ZPI in magenta and PZ in yellow; pdb: 3F1S). The reactive loop of antithrombin (in red) is bound in the active-site of FXa in a manner that places both antithrombin and the ZPI-PZ complex in an orthogonal orientation relative to FVa and thus minimally interferes with the interaction of FXa with FVa in prothrombinase except for the A2 domain C-terminal peptide interaction of FVa with the heparin binding exosite of FXa. The model was prepared using PyMol software v. 2.2.3.

## Supplementary Table S1

**Supplementary Table S1. Parameters derived from thrombin generation assays in normal human plasma with TF, FXa and FXIIa triggers**

|     | TF, 5pM     |            |             | TF, 2pM     |           |             | TF, 0.6pM   |            |            |
|-----|-------------|------------|-------------|-------------|-----------|-------------|-------------|------------|------------|
|     | +PZAb       | -          | +ZPI-PZ     | +PZAb       | -         | +ZPI-PZ     | +PZAb       | -          | +ZPI-PZ    |
| LT  | 1.7±0       | 1.7±0      | 1.9±0.2     | 3.1±0.1*    | 3.4±0.1   | 3.7±0.1*    | 4.9±0.2*    | 6.6±0.2    | 7.7±0.1*   |
| TP  | 249.0±6.0*  | 172.0±7.0  | 101.0±9.0*  | 146.0±4.0*  | 79.0±0.3  | 39.0±0.7*   | 64.6±8.5*   | 42.4±0.3   | 18.8±1.2*  |
| TTP | 3.7±0.1*    | 4.1±0.1    | 4.4±0.1*    | 6.1±0.1*    | 6.4±0.1   | 6.7±0.1*    | 9.2±0.2*    | 9.7±0.1    | 11.1±0.2*  |
| ETP | 984.0±14.0* | 901.0±41.0 | 782.0±44.0* | 979.0±68.0* | 718.0±3.0 | 435.0±25.0* | 701.0±64.0* | 502.0±52.0 | 204.0±6.0* |

  

|     | FXa, 0.7nM  |            |             | FXa, 0.23nM |            |            | FXa, 0.03nM |            |             |
|-----|-------------|------------|-------------|-------------|------------|------------|-------------|------------|-------------|
|     | +PZAb       | -          | +ZPI-PZ     | +PZAb       | -          | +ZPI-PZ    | +PZAb       | -          | +ZPI-PZ     |
| LT  | 1.0±0.1     | 1.0±0.1    | 1.0±0.1     | 1.3±0.1     | 1.3±0.1    | 1.3±0.1    | 4.5±0.2     | 4.6±0.2    | 4.7±0.3     |
| TP  | 218.5±0.8*  | 169.7±1.4  | 106.6±1.0*  | 118.5±5.4*  | 75.3±0.6   | 45.8±0.3*  | 31.8±0.6*   | 24.2±0.6   | 14.7±0.2*   |
| TTP | 3.0±0.0.1   | 3.0±0.1    | 3.0±0.1     | 4.0±0.1     | 3.7±0.3    | 3.6±0.2    | 9.6±0.2     | 9.5±0.1    | 9.7±0.2     |
| ETP | 849.0±14.4* | 796.7±23.6 | 701.5±47.5* | 788.0±7.4*  | 656.7±23.9 | 546.5±0.5* | 555.7±16.8* | 459.0±51.2 | 173.5±26.5* |

  

|     | FXIIa, 18nM |            |             | FXIIa, 3nM |            |             | FXIIa, 0.8nM |            |            |
|-----|-------------|------------|-------------|------------|------------|-------------|--------------|------------|------------|
|     | +PZAb       | -          | +ZPI-PZ     | +PZAb      | -          | +ZPI-PZ     | +PZAb        | -          | +ZPI-PZ    |
| LT  | 8.0±0.2*    | 9.0±0.2    | 9.5±0.1*    | 9.8±0.5*   | 10.7±0.4   | 12.2±0.2*   | 11.3±0.1*    | 12.6±0.1   | 13.5±0.1*  |
| TP  | 196.0±4.1   | 198.0±2.2  | 153.1±6.2*  | 101.8±5.4  | 97.8±9.1   | 65.4±5.4*   | 88.3±1.0*    | 77.3±0.5   | 49.6±2.5*  |
| TTP | 10.3±0.1*   | 11.3±0.4   | 12.2±0.1*   | 13.0±0.1*  | 14.3±0.2   | 15.3±0.3*   | 15.3±0.1*    | 16.0±0.2   | 16.6±0.1*  |
| ETP | 928.3±49.6  | 913.7±15.6 | 848.0±24.0* | 795.0±35.3 | 770.7±62.6 | 496.5±39.5* | 672.2±17.5*  | 576.9±38.0 | 374.9±8.5* |

\* $P < 0.05$  vs. no PZAb or ZPI-PZ. LT, lag time, min. TP, thrombin peak, nM. TTP, time to thrombin peak, min. ETP, endogenous thrombin potential, nM thrombin x min.
